# Supplementary material for: Demersal fishery Impacts on Sedimentary Organic Matter (DISOM): a global harmonized database of studies assessing the impacts of demersal fisheries on sediment biogeochemistry
Source: Copernicus journal article supplement (doi:10.5194/essd-16-3547-2024), 2024-08-07
Supplement: Supplementary file 1 [file essd-16-3547-2024-supplement.zip]

## Sheet: READ ME
This Supplementary Information holds different tables that explain the publications included in DISOM and provides greater detail of the structure of the database.
You can find below a description of each table.
Table name	Description
Table S1	Publications extracted from Web of Science and Scopus and the output of the preliminary screening and inclusion criteria, as well as the reasons behind the exclusion of each publication.
Table S2	Response variables extracted from all studies, separated by the study design where they are found.
Table S3	Description of the columns from "study_description" sub-table from DISOM.
Table S4	Description of the columns from "sampling_location" sub-table from DISOM.
Table S5	Description of the columns from "response_variables" sub-table from DISOM.

## Sheet: Table S1
Article_id	First author	Title	Year	Journal	DOI	First screening	Reason for exclusion	Second screening	Reason for exclusion2
194	Tsikopoulou I.	Linking Species Functional Traits to Specific Biogeochemical Processes under Trawling Pressure	2022	Biology	https://doi.org/10.3390/biology11101378	TRUE		TRUE
0	Tiano J.C.	Trawling effects on biogeochemical processes are mediated by fauna in high-energy biogenic-reef-inhabited coastal sediments	2022	Biogeosciences	https://doi.org/10.5194/bg-19-2583-2022	TRUE		TRUE
1	Lamarque B.	Spatial distributions of surface sedimentary organics and sediment profile image characteristics in a high-energy temperate marine RiOMar: The West Gironde Mud Patch	2021	Journal of Marine Science and Engineering	https://doi.org/10.3390/jmse9030242	TRUE		TRUE
2	Morys C.	Impacts of bottom trawling on benthic biogeochemistry: an experimental field study	2021	Marine Environmental Research	https://doi.org/10.1016/j.marenvres.2021.105384	TRUE		TRUE
3	Wang	Recovery of tropical marine benthos after a trawl ban demonstrates linkage between abiotic and biotic changes	2021	Communications Biology	https://doi.org/10.1038/s42003-021-01732-y	TRUE		FALSE	Before Trawl ban - After Trawl ban study. No comparison of trawled vs untrawled site. Shouldn't be included in the meta-analysis.
4	Haalboom S.	Suspended particulate matter in a submarine canyon (Whittard Canyon, Bay of Biscay, NE Atlantic Ocean): Assessment of commonly used instruments to record turbidity	2021	Marine Geology	https://doi.org/10.1016/j.margeo.2021.106439	FALSE	Bottom trawling as possible mechanism of sediment resuspension
5	Paradis S.	Persistence of Biogeochemical Alterations of Deep-Sea Sediments by Bottom Trawling	2021	Geophysical Research Letters	https://doi.org/10.1029/2020GL091279	TRUE		TRUE
6	Porz L.	Physical processes controlling mud depocenter development on continental shelves – Geological, oceanographic, and modeling concepts	2021	Marine Geology	https://doi.org/10.1016/j.margeo.2020.106402	FALSE	Review article of mud depocenters, where trawling could be an important factor
7	Durrieu de Madron X.	Approaches to evaluate spatial and temporal variability of deep marine sediment characteristics under the impact of dense water formation events	2020	Mediterranean Marine Science	http://dx.doi.org/10.12681/mms.22581	FALSE	Trawling as a possible explanation of their results
8	Ferguson A.J.	Bottom trawling reduces benthic and denitrification and has the potential to influence the global nitrogen cycle	2020	Limnology and Oceanography	https://doi.org/10.1002/lol2.10150	TRUE		TRUE
9	Kwong L.E.	Mesozooplankton and Micronekton Active Carbon Transport in Contrasting Eddies	2020	Frontiers in Marine Science	10.3389/fmars.2019.00825	FALSE	Not studying the impacts of bottom trawling
10	McLaverty C.	High-resolution fisheries data reveal effects of bivalve dredging on benthic communities in stressed coastal systems	2020	Marine Ecology Progress Series	https://doi.org/10.3354/meps13330	TRUE		TRUE
11	Ramalho S.P.	Ecosystem Functioning Under the Influence of Bottom-Trawling Disturbance: An Experimental Approach and Field Observations From a Continental Slope Area in the West Iberian Margin	2020	Frontiers in Marine Science	https://doi.org/10.3389/fmars.2020.00457	TRUE		TRUE
12	Silveira S.	Artisanal trawling impact over prey availability and diet of estuarine megabenthic organisms in southern Brazil	2020	Estuarine, Coastal and Shelf Science	10.1016/j.ecss.2020.106682	TRUE		TRUE
13	McLaverty C.	Using large benthic macrofauna to refine and improve ecological indicators of bottom trawling disturbance	2019	Ecological Indicators	https://doi.org/10.1016/j.ecolind.2019.105811	TRUE		TRUE
14	Bancon-Montigny C.	Seasonal changes of chemical contamination in coastal waters during sediment resuspension	2019	Chemosphere	10.1016/j.chemosphere.2019.06.213	FALSE	Impact of bottom trawling on water column
15	Boudaya L.	Structure of the benthic macrofauna of an anthropogenic influenced area: Skhira bay (gulf of gabès, central mediterranean sea)	2019	Environmental Science and Pollution Research	10.1007/s11356-019-04809-8	TRUE		FALSE	No control site, this is only a background study of the conditions in a trawled site, which is needed to conduct long-term monitoring of the bay
16	Gallmetzer I.	Tracing origin and collapse of Holocene benthic baseline communities in the northern Adriatic Sea	2019	Palaios	10.2110/palo.2018.068	TRUE		FALSE	Trawling as a possible explanation of their results/Not studying impact of bottom trawling
17	Kokubu Y.	Revealing the deposition of macrophytes transported offshore: Evidence of their long-distance dispersal and seasonal aggregation to the deep sea	2019	Scientific Reports	10.1038/s41598-019-39982-w	FALSE	Not studying the impacts of bottom trawling
18	Moya-Urbano E.	Biodiversity and spatio-temporal changes of benthic and demersal assemblages of circalittoral soft bottoms of the Bay of Málaga (northern Alboran Sea)	2019	Journal of the Marine Biological Association of the United Kingdom	10.1017/S0025315419000766	TRUE		FALSE	Only fauna data - excluded from meta-analysis
19	Rajesh N.	Impact of bottom trawling on water and sediment characteristics of cuddalore and parangipettai coastal waters	2019	Indian Journal of Geo-Marine Sciences		TRUE		TRUE
20	Paradis S.	Organic matter contents and degradation in a highly trawled area during fresh particle inputs (Gulf of Castellammare, southwestern Mediterranean)	2019	Biogeosciences	10.5194/bg-16-4307-2019	TRUE		TRUE
21	Pham C.K.	Removal of deep-sea sponges by bottom trawling in the Flemish Cap area: conservation, ecology and economic assessment	2019	Scientific Reports	10.1038/s41598-019-52250-1	FALSE	No data of sedimentary OC (or derived proxy)
22	Rybakova E.	Deep-sea megabenthos communities of the Eurasian Central Arctic are influenced by ice-cover and sea-ice algal falls	2019	PLoS ONE	10.1371/journal.pone.0211009	FALSE	Not studying the impacts of bottom trawling
23	Tiano J.C.	Acute impacts of bottom trawl gears on benthic metabolism and nutrient cycling	2019	ICES Journal of Marine Science	10.1093/icesjms/fsz060	TRUE		TRUE
24	Fanelli E.	Deep-sea mobile megafauna of Mediterranean submarine canyons and open slopes: Analysis of spatial and bathymetric gradients	2018	Progress in Oceanography	10.1016/j.pocean.2018.09.010	FALSE	Not studying the impacts of bottom trawling
25	Hartwell S.I.	Benthic habitat contaminant status and sediment toxicity in Bristol Bay, Alaska	2018	Regional Studies in Marine Science	10.1016/j.rsma.2018.09.009	FALSE	Not studying the impacts of bottom trawling
26	Linders T.	Particle sources and transport in stratified Nordic coastal seas in the Anthropocene	2018	Elementa	10.1525/elementa.149	FALSE	Impacts of sediment remobilization by bottom trawling along the canyon
27	Minami K.	Stage-specific distribution of Japanese sea cucumber Apostichopus japonicus in Maizuru Bay, Sea of Japan, in relation to environmental factors	2018	Fisheries Science	10.1007/s12562-017-1174-1	FALSE	Not studying the impacts of bottom trawling
28	Ramalho S.P.	Bottom-trawling fisheries influence on standing stocks, composition, diversity and trophic redundancy of macrofaunal assemblages from the West Iberian Margin	2018	Deep-Sea Research Part I: Oceanographic Research Papers	10.1016/j.dsr.2018.06.004	TRUE		TRUE
29	Román S.	Nematode community zonation in response to environmental drivers in Blanes Canyon (NW Mediterranean)	2018	Journal of Experimental Marine Biology and Ecology	10.1016/j.jembe.2017.08.010	FALSE	Impacts of sediment remobilization by bottom trawling along the canyon
30	Schnedl S.-M.	Molluscan benthic communities at Brijuni Islands (northern Adriatic Sea) shaped by Holocene sea-level rise and recent human eutrophication and pollution	2018	Holocene	10.1177/0959683618788651	FALSE	Chronological changes in long sediment core, effect of anthropogenic activities (bottom trawling, pollution, eutrophication)
31	Sergio A.-G.	Phospholipid ester fatty acids (PLFA) in bottom trawling fishing areas in the gulf of California	2018	Revista Internacional de Contaminacion Ambiental	10.20937/RICA.2018.34.01.10	TRUE		FALSE	Not enough data
32	Torruco D.	Fish diversity, distribution and their relationship with environmental variables in Southern Gulf of Mexico. [Diversidad y distribución de peces y su relación con variables ambientales, en el sur del golfo de México]	2018	Revista de Biologia Tropical	10.15517/rbt.v66i1.26255	FALSE	Not studying the impacts of bottom trawling
33	Van De Velde S.	Anthropogenic disturbance keeps the coastal seafloor biogeochemistry in a transient state	2018	Scientific Reports	10.1038/s41598-018-23925-y	TRUE		TRUE
34	Clark M.	Comparative analysis of environmental impacts of agricultural production systems, agricultural input efficiency, and food choice	2017	Environmental Research Letters	10.1088/1748-9326/aa6cd5	FALSE	Greenhouse gas emissions by agriculture and fisheries (including bottom trawling)
35	Gislason H.	Lost in translation? Multi-metric macrobenthos indicators and bottom trawling	2017	Ecological Indicators	10.1016/j.ecolind.2017.07.004	FALSE	No data of sedimentary OC (or derived proxy)
36	Hendrickx M.E.	The genus Spirontocaris Spence Bate, 1888 (Caridea, Decapoda, Thoridae) in western Mexico	2017	Zootaxa	10.11646/zootaxa.4320.2.6	FALSE	Not studying the impacts of bottom trawling
37	Pierdomenico M.	Megabenthic assemblages at the Hudson Canyon head (NW Atlantic margin): Habitat-faunal relationships	2017	Progress in Oceanography	10.1016/j.pocean.2017.08.001	FALSE	Not studying the impacts of bottom trawling
38	Sciberras M.	Mediation of nitrogen by post-disturbance shelf communities experiencing organic matter enrichment	2017	Biogeochemistry	10.1007/s10533-017-0370-5	TRUE		TRUE
39	Sui H.-Z.	Feeding habits of Rhinogobius pflaumi in Jiaozhou Bay, China based on carbon and nitrogen stable isotope analysis	2017	Chinese Journal of Applied Ecology	10.13287/j.1001-9332.201711.034	FALSE	Not studying the impacts of bottom trawling
40	Xu Y.	Seasonal and spatial variations of macro- and megabenthic community characteristics in two sections of the East China Sea	2017	Chinese Journal of Oceanology and Limnology	10.1007/s00343-017-6085-6	FALSE	Not studying the impacts of bottom trawling
41	Rosli N.	Differences in meiofauna communities with sediment depth are greater than habitat effects on the New Zealand continental margin: implications for vulnerability to anthropogenic disturbance	2016	PeerJ	https://doi.org/10.7717/peerj.2154	TRUE		TRUE
42	Mercaldo-Allen R.	Benthic Ecology of Northern Quahog Beds with Different Hydraulic Dredging Histories in Long Island Sound	2016	Journal of Coastal Research	https://doi.org/10.2112/JCOASTRES-D-15-00055.1	TRUE		FALSE	Recovery study
43	Anderson O.F.	Field validation of habitat suitability models for vulnerable marine ecosystems in the South Pacific Ocean: Implications for the use of broad-scale models in fisheries management	2016	Ocean and Coastal Management	10.1016/j.ocecoaman.2015.11.025	FALSE	Modelling of vulnerable marine ecosystems
44	Antelo L.T.	Pollutant levels in discarded fish species by Spanish trawlers operating in the Great Sole Bank and the Atlantic coast of the Iberian Peninsula	2016	Marine Pollution Bulletin	10.1016/j.marpolbul.2016.04.040	FALSE	Not studying the impacts of bottom trawling
45	Baturin G.N.	Phosphatized calcareous conglomerate from the Kara Sea floor	2016	Oceanology	10.1134/S0001437016050027	FALSE	Not studying the impacts of bottom trawling
46	Caruso G.	Digestive enzymatic patterns as possible biomarkers of endocrine disruption in the red mullet (Mullus barbatus): A preliminary investigation	2016	Marine Pollution Bulletin	10.1016/j.marpolbul.2016.03.005	FALSE	Not studying the impacts of bottom trawling
47	Chan A.K.Y.	Sediment characteristics and benthic ecological status in contrasting marine environments of subtropical Hong Kong	2016	Marine Pollution Bulletin	10.1016/j.marpolbul.2015.12.032	FALSE	Trawling as a possible explanation of their results
48	Gallagher A.	Microplastics in the Solent estuarine complex, UK: An initial assessment	2016	Marine Pollution Bulletin	10.1016/j.marpolbul.2015.04.002	FALSE	Not studying the impacts of bottom trawling
49	Hale R.	Mediation of macronutrients and carbon by post-disturbance shelf sea communities	2016	Biogeochemistry	10.1007/s10533-017-0350-9	TRUE		TRUE
50	Levin L.A.	Hydrothermal vents and methane seeps: Rethinking the sphere of influence	2016	Frontiers in Marine Science	10.3389/fmars.2016.00072	FALSE	Not studying the impacts of bottom trawling
51	Román S.	High spatiotemporal variability in meiofaunal assemblages in Blanes Canyon (NW Mediterranean) subject to anthropogenic and natural disturbances	2016	Deep-Sea Research Part I: Oceanographic Research Papers	10.1016/j.dsr.2016.10.004	FALSE	Impacts of sediment remobilization by bottom trawling along the canyon
52	Romano C.	Spatial variability of soft-bottom macrobenthic communities in northern Sicily (Western Mediterranean): Contrasting trawled vs. untrawled areas	2016	Marine Environmental Research	10.1016/j.marenvres.2016.10.002	FALSE	No data of sedimentary OC (or derived proxy)
53	Sciberras M.	Impacts of bottom fishing on the sediment infaunal community and biogeochemistry of cohesive and non-cohesive sediments	2016	Limnology and Oceanography	10.1002/lno.10354	TRUE		TRUE
54	Wu Y.	Seasonal dynamics of particulate organic matter in the Changjiang Estuary and adjacent coastal waters illustrated by amino acid enantiomers	2016	Journal of Marine Systems	10.1016/j.jmarsys.2015.04.006	FALSE	Impact of bottom trawling on water column
55	Zapata-Hernández G.	Community structure and trophic ecology of megabenthic fauna from the deep basins in the Interior Sea of Chiloé, Chile (41–43° S)	2016	Continental Shelf Research	10.1016/j.csr.2016.10.002	FALSE	Not studying the impacts of bottom trawling
56	Cerrano C.	Do colonies of Lytocarpia myriophyllum, L. 1758 (Cnidaria, Hydrozoa) affect the biochemical composition and the meiofaunal diversity of surrounding sediments?	2015	Chemistry and Ecology	10.1080/02757540.2014.966699	FALSE	Not studying the impacts of bottom trawling
57	Denadai M.R.	Feeding habits of whitemouth croaker Micropogonias furnieri (Perciformes: Sciaenidae) in Caraguatatuba Bay, southeastern Brazil	2015	Brazilian Journal of Oceanography	10.1590/S1679-87592015084706302	FALSE	Not studying the impacts of bottom trawling
58	Kutti T.	Metabolic responses of the deep-water sponge Geodia barretti to suspended bottom sediment, simulated mine tailings and drill cuttings	2015	Journal of Experimental Marine Biology and Ecology	10.1016/j.jembe.2015.07.017	FALSE	Experimental study of impact of sediment resuspension by bottom trawling on sponges, no data of OC (or related proxy)
59	Muntadas A.	Integrating the provision of ecosystem services and trawl fisheries for the management of the marine environment	2015	Science of the Total Environment	10.1016/j.scitotenv.2014.11.042	TRUE		TRUE
60	Pusceddu A.	Quantity and biochemical composition of particulate organic matter in a highly trawled area (thermaikos gulf, eastern mediterranean sea)	2015	Advances in Oceanography and Limnology	10.4081/aiol.2015.5448	FALSE	Impact of bottom trawling on water column
61	Ravelo A.M.	Spatial variability of epibenthic communities on the Alaska Beaufort Shelf	2015	Polar Biology	10.1007/s00300-015-1741-9	FALSE	Not studying the impacts of bottom trawling
62	Suprenand P.M.	Distribution of gymnosomatous pteropods in western Antarctic Peninsula shelf waters: Influences of Southern Ocean water masses	2015	Polar Record	10.1017/S003224741300065X	FALSE	Not studying the impacts of bottom trawling
63	Willems T.	Distribution patterns of the demersal fish fauna on the inner continental shelf of Suriname	2015	Regional Studies in Marine Science	10.1016/j.rsma.2015.10.008	FALSE	Not studying the impacts of bottom trawling
64	Wilson A.M.	Anthropogenic influence on sediment transport in the Whittard Canyon, NE Atlantic	2015	Marine Pollution Bulletin	10.1016/j.marpolbul.2015.10.067	FALSE	Impacts of sediment remobilization by bottom trawling along the canyon
65	Costa K.	Effects of small-scale trawling on benthic communities of estuarine vegetated and non-vegetated habitats	2014	Biodiversity and Conservation	https://doi.org/10.1007/s10531-014-0652-3	TRUE		TRUE
66	Dannheim J.	Trophic look at soft-bottom communities — Short-term effects of trawling cessation on benthos	2014	Journal of Sea Research	https://doi.org/10.1016/j.seares.2013.09.005	TRUE		TRUE
67	Goldberg R.	Effects of hydraulic dredging on the benthic ecology and sediment chemistry on a cultivated bed of the Northern quahog, Mercenaria mercenaria	2014	Aquaculture	https://doi.org/10.1016/j.aquaculture.2014.03.012	TRUE		TRUE
68	Meseck S.L.	Effects of Hydraulic Dredging for Mercenaria mercenaria, Northern Quahog, on Sediment Biogeochemistry	2014	World Aquaculture Society	https://doi.org/10.1111/jwas.12114	TRUE		TRUE
69	Martín J.	Impact of bottom trawling on deep-sea sediment properties along the flanks of a submarine canyon	2014	PLoS ONE	10.1371/journal.pone.0104536	TRUE		TRUE
70	Palanques A.	Effects of bottom trawling on the Ebro continental shelf sedimentary system (NW Mediterranean)	2014	Continental Shelf Research	10.1016/j.csr.2013.10.008	TRUE		TRUE
71	Pusceddu A.	Chronic and intensive bottom trawling impairs deep-sea biodiversity and ecosystem functioning	2014	Proceedings of the National Academy of Sciences of the United States of America	10.1073/pnas.1405454111	TRUE		TRUE
72	Roy V.	Environmental drivers of the Canadian Arctic megabenthic communities	2014	PLoS ONE	10.1371/journal.pone.0100900	FALSE	Not studying the impacts of bottom trawling
73	Blanchard A.L.	Benthic ecology of the northeastern Chukchi Sea. Part II. Spatial variation of megafaunal community structure, 2009-2010	2013	Continental Shelf Research	10.1016/j.csr.2013.04.031	FALSE	Not studying the impacts of bottom trawling
74	Cousins N.	Abyssal scavenging demersal fauna at two areas of contrasting productivity on the Subantarctic Crozet Plateau, southern Indian Ocean	2013	African Journal of Marine Science	10.2989/1814232X.2013.802747	FALSE	Not studying the impacts of bottom trawling
75	Dévier M.	Biliary PAH metabolites, EROD activity and DNA damage in dab (Limanda limanda) from Seine Estuary (France)	2013	Environmental Science and Pollution Research	10.1007/s11356-012-1345-7	FALSE	Not studying the impacts of bottom trawling
76	Freedman J.A.	Gravel dredging alters diversity and structure of riverine fish assemblages	2013	Freshwater Biology	10.1111/fwb.12056	FALSE	No data of sedimentary OC (or derived proxy)
77	Lopez-Fernandez P.	Multiple drivers of particle fluxes in the Blanes submarine canyon and southern open slope: Results of a year round experiment	2013	Progress in Oceanography	10.1016/j.pocean.2013.07.029	FALSE	Impacts of sediment remobilization by bottom trawling along the canyon
78	Radabaugh K.R.	Seasonal δ13C and δ15N isoscapes of fish populations along a continental shelf trophic gradient	2013	Continental Shelf Research	10.1016/j.csr.2013.08.010	FALSE	Not studying the impacts of bottom trawling
79	Sañé E.	Organic biomarkers in deep-sea regions affected by bottom trawling: Pigments, fatty acids, amino acids and carbohydrates in surface sediments from the la Fonera (Palamós) Canyon, NW Mediterranean Sea	2013	Biogeosciences	10.5194/bg-10-8093-2013	TRUE		TRUE
80	Almroth-Rosell E.	Effects of simulated natural and massive resuspension on benthic oxygen, nutrient and dissolved inorganic carbon fluxes in Loch Creran, Scotland	2012	Journal of Sea Research	10.1016/j.seares.2012.04.012	TRUE		FALSE	Sediment stirring to mimick the effect of trawling
81	Alongi D.M.	Early diagenetic processes in relation to river discharge and coastal upwelling in the Aru Sea, Indonesia	2012	Marine Chemistry	10.1016/j.marchem.2012.06.002	FALSE	Trawling as a possible explanation of their results
82	Currie D.R.	Biophysical factors affecting the distribution of demersal fish around the head of a submarine canyon off the bonney coast, South Australia	2012	PLoS ONE	10.1371/journal.pone.0030138	FALSE	Not studying the impacts of bottom trawling
83	Fanelli E.	Assemblage structure and trophic ecology of deep-sea demersal cephalopods in the Balearic basin (NW Mediterranean)	2012	Marine and Freshwater Research	10.1071/MF11157	FALSE	Not studying the impacts of bottom trawling
84	Kokubu Y.	Biomass of marine macrophyte debris on the ocean floor southeast of hokkaido Island adjusted by experimental catch efficiency estimates	2012	Mer		FALSE	Not studying the impacts of bottom trawling
85	Lebrato M.	Jelly-falls historic and recent observations: A review to drive future research directions	2012	Hydrobiologia	10.1007/s10750-012-1046-8	FALSE	Not studying the impacts of bottom trawling
86	Moya F.	Environmental control on the structure of echinoid assemblages in the Bellingshausen Sea (Antarctica)	2012	Polar Biology	10.1007/s00300-012-1176-5	FALSE	Not studying the impacts of bottom trawling
87	Papiol V.	Influence of environmental variables on the spatio-temporal dynamics of bentho-pelagic assemblages in the middle slope of the Balearic Basin (NW Mediterranean)	2012	Deep-Sea Research Part I: Oceanographic Research Papers	10.1016/j.dsr.2011.11.008	FALSE	Not studying the impacts of bottom trawling
88	Allan I.J.	Mobile passive samplers: Concept for a novel mode of exposure	2011	Environmental Pollution	10.1016/j.envpol.2011.06.039	FALSE	Not studying the impacts of bottom trawling
89	Atkinson L.J.	Effects of demersal trawling along the west coast of southern Africa: Multivariate analysis of benthic assemblages	2011	Marine Ecology Progress Series	10.3354/meps08956	TRUE		TRUE
90	Catul V.	A review on mesopelagic fishes belonging to family Myctophidae	2011	Reviews in Fish Biology and Fisheries	10.1007/s11160-010-9176-4	FALSE	Not studying the impacts of bottom trawling
91	de Juan S.	Influence of environmental factors on the dynamics of macrobenthic crustaceans on soft-bottoms of the ebro delta continental shelf (northwestern mediterranean)	2011	Scientia Marina	10.3989/scimar.2011.75n4691	TRUE		FALSE	Data already included in Palanques et al., 214 and Cartes et al., 27
92	Hasanati M.	Assessment of the sources of polycyclic aromatic hydrocarbons in Mousa Inlet by molecular ratios	2011	Journal of Environmental Studies		FALSE	Not studying the impacts of bottom trawling
93	Huvenne V.A.I.	A picture on the wall: Innovative mapping reveals cold-water coral refuge in submarine canyon	2011	PLoS ONE	10.1371/journal.pone.0028755	FALSE	Not studying the impacts of bottom trawling
94	Kaiser S.	Is there a distinct continental slope fauna in the Antarctic?	2011	Deep-Sea Research Part II: Topical Studies in Oceanography	10.1016/j.dsr2.2010.05.017	FALSE	Not studying the impacts of bottom trawling
95	Laxson C.J.	Decreasing urea: Trimethylamine N-oxide ratios with depth in chondrichthyes: A physiological depth limit?	2011	Physiological and Biochemical Zoology	10.1086/661774	FALSE	Not studying the impacts of bottom trawling
96	Liu X.-S.	Response of meiofaunal community with special reference to nematodes upon deployment of artificial reefs and cessation of bottom trawling in subtropical waters, Hong Kong	2011	Marine Pollution Bulletin	10.1016/j.marpolbul.2010.11.019	TRUE		TRUE
97	Tecchio S.	Drivers of deep Mediterranean megabenthos communities along longitudinal and bathymetric gradients	2011	Marine Ecology Progress Series	10.3354/meps09333	FALSE	Not studying the impacts of bottom trawling
98	Wilding T.A.	A characterization and sensitivity analysis of the benthic biotopes around Scottish salmon farms with a focus on the sea pen Pennatula phosphorea L	2011	Aquaculture Research	10.1111/j.1365-2109.2010.02675.x	FALSE	Not studying the impacts of bottom trawling
99	Kenchington E.	Effects of experimental otter trawling on the macrofauna of a sandy bottom ecosystem on the Grand Banks of Newfoundland	2011	Canadian Journal of Fisheries and Aquatic Sciences	https://doi.org/10.1139/f01-053	TRUE		FALSE	Not enough data
100	Bhagirathan U.	Impact of bottom trawling on sediment characteristics-a study along inshore waters off Veraval coast, India	2010	Environmental Monitoring and Assessment	10.1007/s10661-008-0700-0	TRUE		TRUE
101	De Leo F.C.	Submarine canyons: Hotspots of benthic biomass and productivity in the deep sea	2010	Proceedings of the Royal Society B: Biological Sciences	10.1098/rspb.2010.0462	FALSE	Not studying the impacts of bottom trawling
102	Jordan S.J.	Summer fish communities in northern Gulf of Mexico estuaries: Indices of ecological condition	2010	Ecological Indicators	10.1016/j.ecolind.2009.09.003	FALSE	Not studying the impacts of bottom trawling
103	Langhamer O.	Effects of wave energy converters on the surrounding soft-bottom macrofauna (west coast of Sweden)	2010	Marine Environmental Research	10.1016/j.marenvres.2010.01.002	FALSE	Not studying the impacts of bottom trawling
104	Liquete C.	Modern sedimentation patterns and human impacts on the Barcelona continental shelf (NE Spain)	2010	Geologica Acta	10.1344/105.000001528	FALSE	Trawling as a possible explanation of their results
105	Samadi S.	Biodiversity of deep-sea organisms associated with sunken-wood or other organic remains sampled in the tropical Indo-Pacific	2010	Cahiers de Biologie Marine		FALSE	Not studying the impacts of bottom trawling
106	Takai N.	Transport and deposition of macrophytes to the dysphotic bottom of coastal waters	2010	Aquatic Botany	10.1016/j.aquabot.2010.01.007	FALSE	Not studying the impacts of bottom trawling
107	Cartes J.E.	Small-spatial scale changes in productivity of suprabenthic and infaunal crustaceans at the continental shelf of Ebro Delta (western Mediterranean)	2009	Journal of Experimental Marine Biology and Ecology	10.1016/j.jembe.2009.07.025	FALSE	Trawling as a possible explanation of their results
108	Cartes J.E.	The distribution of megabenthic, invertebrate epifauna in the Balearic Basin (western Mediterranean) between 400 and 2300 m: Environmental gradients influencing assemblages composition and biomass trends	2009	Journal of Sea Research	10.1016/j.seares.2009.01.005	FALSE	Not studying the impacts of bottom trawling
109	Nixon S.W.	The impact of changing climate on phenology, productivity, and benthic-pelagic coupling in Narragansett Bay	2009	Estuarine, Coastal and Shelf Science	10.1016/j.ecss.2008.12.016	FALSE	Not studying the impacts of bottom trawling
110	Olu K.	Influence of seep emission on the non-symbiont-bearing fauna and vagrant species at an active giant pockmark in the Gulf of Guinea (Congo-Angola margin)	2009	Deep-Sea Research Part II: Topical Studies in Oceanography	10.1016/j.dsr2.2009.04.017	FALSE	Not studying the impacts of bottom trawling
111	Sánchez A.	Sedimentary geochemistry in areas of trawling and bottom trawling off the coast of Sinaloa, Sonora, Gulf of California [Geoquímica sedimentaria en áreas de pesca de arrastre y no arrastre de fondo en la costa de Sinaloa-Sonora, Golfo de California]	2009	Boletin de la Sociedad Geologica Mexicana		TRUE		TRUE
112	Waddington K.I.	Contribution of bait to lobster production in an oligotrophic marine ecosystem as determined using a mass balance model	2009	Fisheries Research	10.1016/j.fishres.2009.04.002	FALSE	Not studying the impacts of bottom trawling
113	Booth J.A.T.	Size-frequency dynamics of NE Pacific abyssal ophiuroids (Echinodermata: Ophiuroidea)	2008	Marine Biology	10.1007/s00227-008-0982-3	FALSE	Not studying the impacts of bottom trawling
114	Olsgard F.	Effects of bottom trawling on ecosystem functioning	2008	Journal of Experimental Marine Biology and Ecology	https://doi.org/10.1016/j.jembe.2008.07.036	TRUE		FALSE	No sediment organic carbon (or related parameters)
115	Simboura N.	A Baseline Study on Benthic Species Distribution in Two Neighbouring Gulfs, With and Without Access to Bottom Trawling	2008	Marine Ecology Progress Series	https://doi.org/10.1111/j.1439-0485.1998.tb00469.x	TRUE		TRUE
116	Sánchez F.	Habitat characteristics as determinant of the structure and spatial distribution of epibenthic and demersal communities of Le Danois Bank (Cantabrian Sea, N. Spain)	2008	Journal of Marine Systems	10.1016/j.jmarsys.2007.04.008	FALSE	Not studying the impacts of bottom trawling
117	Serrano A.	Spatial distribution patterns of demersal and epibenthic communities on the Galician continental shelf (NW Spain)	2008	Journal of Marine Systems	10.1016/j.jmarsys.2007.05.012	FALSE	Not studying the impacts of bottom trawling
118	Smith C.R.	Preface and brief synthesis for the FOODBANCS volume	2008	Deep-Sea Research Part II: Topical Studies in Oceanography	10.1016/j.dsr2.2008.08.001	FALSE	Not studying the impacts of bottom trawling
119	Sutton T.T.	Vertical structure, biomass and topographic association of deep-pelagic fishes in relation to a mid-ocean ridge system	2008	Deep-Sea Research Part II: Topical Studies in Oceanography	10.1016/j.dsr2.2007.09.013	FALSE	Not studying the impacts of bottom trawling
120	Alongi D.M.	Deposition, mineralization, and storage of carbon and nitrogen in sediments of the far northern and northern Great Barrier Reef shelf	2007	Continental Shelf Research	10.1016/j.csr.2007.07.002	FALSE	Trawling as a possible explanation of their results
121	Cartes J.E.	Dynamics of suprabenthos off the Ebro Delta (Catalan Sea: western Mediterranean): Spatial 13 and temporal patterns and relationships with environmental factors	2007	Estuarine, Coastal and Shelf Science	10.1016/j.ecss.2007.05.047	TRUE		TRUE
122	Fanelli E.	Decapod crustacean assemblages off the West coast of central Italy (western Mediterranean)	2007	Scientia Marina	10.3989/scimar.2007.71n119	FALSE	Not studying the impacts of bottom trawling
123	Nodder S.D.	Focusing of phytodetritus deposition beneath a deep-ocean front, Chatham Rise, New Zealand	2007	Limnology and Oceanography	10.4319/lo.2007.52.1.0299	FALSE	Not studying the impacts of bottom trawling
124	Martín J.	Composition and variability of downward particulate matter fluxes in the Palamós submarine canyon (NW Mediterranean)	2006	Journal of Marine Systems	10.1016/j.jmarsys.2005.09.010	FALSE	Impacts of sediment remobilization by bottom trawling along the canyon
125	Pakhomov E.A.	Structure and distribution of the slope fish community in the vicinity of the sub-Antarctic Prince Edward Archipelago	2006	Journal of Fish Biology	10.1111/j.1095-8649.2006.01076.x	FALSE	No data of sedimentary OC (or derived proxy)
126	Rotllant G.	Dioxin compounds in the deep-sea rose shrimp Aristeus antennatus (Risso, 1816) throughout the Mediterranean Sea	2006	Deep-Sea Research Part I: Oceanographic Research Papers	10.1016/j.dsr.2006.09.004	FALSE	Not studying the impacts of bottom trawling
127	Serrano A.	Spatial and temporal changes in benthic communities of the Galician continental shelf after the Prestige oil spill	2006	Marine Pollution Bulletin	10.1016/j.marpolbul.2005.09.030	FALSE	Not studying the impacts of bottom trawling
128	Serrano A.	Epibenthic communities of trawlable grounds of the Cantabrian Sea	2006	Scientia Marina		TRUE		FALSE	Authors collect fauna samples using beam trawl and sediment parameters using box cores in a fishing ground in the Cantabrian Sea at 3 depth zones. There are no controls. There is no indication of the fishing intensity or whether the transects samples are fished on not. The study is more of a characterization of the area to determine the status quo
129	Brown E.J.	Effects of commercial otter trawling on the physical environment of the southeastern Bering Sea	2005	Continental Shelf Research	10.1016/j.csr.2004.12.005	TRUE		TRUE
130	McAuliffe C.D.	Chevron Main Pass Block 41 oil spill: Chemical and biological investigations	2005	2005 International Oil Spill Conference, IOSC 2005		FALSE	Not applicable study
131	Palanques A.	Downward particle fluxes in the Guadiaro submarine canyon depositional system (north-western Alboran Sea), a river flood dominated system	2005	Marine Geology	10.1016/j.margeo.2005.07.004	FALSE	Impact of bottom trawling on water column
132	Polymenakou P.N.	Benthic microbial abundance and activities in an intensively trawled ecosystem (Thermaikos Gulf, Aegean Sea)	2005	Continental Shelf Research	10.1016/j.csr.2005.08.018	TRUE		TRUE
133	Price N.B.	Temporal and spatial variations in the geochemistry of major and minor particulate and selected dissolved elements of Thermaikos Gulf, Northwestern Aegean Sea	2005	Continental Shelf Research	10.1016/j.csr.2005.08.007	FALSE	Impact of bottom trawling on water column
134	Pusceddu A.	Effects of bottom trawling on the quantity and biochemical composition of organic matter in coastal marine sediments (Thermaikos Gulf, northwestern Aegean Sea)	2005	Continental Shelf Research	10.1016/j.csr.2005.08.013	TRUE		TRUE
135	Pusceddu A.	Impact of natural (storm) and anthropogenic (trawling) sediment resuspension on particulate organic matter in coastal environments	2005	Continental Shelf Research	10.1016/j.csr.2005.08.012	FALSE	Impact of bottom trawling on water column
136	Trimmer M.	Impact of long-term benthic trawl disturbance on sediment sorting and biogeochemistry in the southern North Sea	2005	Marine Ecology Progress Series	10.3354/meps298079	TRUE		TRUE	No control site, only comparison of different areas with different trawling intensity
137	Adriano	Organic carbon changes in the surface sediments of the Venice lagoon	2005	Environment International	https://doi.org/10.1016/j.envint.2005.05.010	TRUE		FALSE	Study does not report results on individual stations (only via maps), but there is also no information on trawling frequency etc. There are too many changing variables as well (venice ecosystem is in flux)
138	Sheridan P.	Short-Term Effects of the Cessation of Shrimp Trawling on Texas Benthic Habitats	2005	American Fisheries Society Symposium		TRUE		TRUE
139	Aurioles-Gamboa D.	Quality differences in feeding areas of the red crab, Pleuroncodes planipes stimpson, as reflected from their lipid, fatty acids, and astaxanthin composition	2004	Crustaceana	10.1163/156854004774003529	FALSE	?
140	Bett B.J.	RRS Charles Darwin Cruise 150, 22 Aug - 15 Sep 2003. Benthic ecology and biogeochemistry of the Pakistan Margin	2004	Cruise Report of the Southampton Oceanography Centre		FALSE	Not applicable study
141	Bett B.J.	RRS Charles Darwin Cruise 145, 12 Mar - 09 Apr 2003. Benthic ecology and biogeochemistry of the Pakistan Margin	2004	Cruise Report of the Southampton Oceanography Centre		FALSE	Not applicable study
142	Bett B.J.	RRS Discovery Cruise 282, 30 Jun - 01 Aug 2004. The environment and ecology of Seine and Sedlo Seamounts, NE Atlantic	2004	Cruise Report of the Southampton Oceanography Centre		FALSE	Not applicable study
143	Bosley K.L.	Biological and physical processes in and around Astoria submarine Canyon, Oregon, USA	2004	Journal of Marine Systems	10.1016/j.jmarsys.2003.06.006	FALSE	Not studying the impacts of bottom trawling
144	Burford M.A.	Dominant sources of dietary carbon and nitrogen for shrimp reared in extensive rice-shrimp ponds	2004	Aquaculture Research	10.1111/j.1365-2109.2004.01012.x	FALSE	Not studying the impacts of bottom trawling
145	Ianson D.	Effect of net avoidance on estimates of diel vertical migration	2004	Limnology and Oceanography	10.4319/lo.2004.49.6.2297	FALSE	Not studying the impacts of bottom trawling
146	Reiss H.	Seasonal variability of epibenthic communities in different areas of the southern North Sea	2004	ICES Journal of Marine Science	10.1016/j.icesjms.2004.06.020	TRUE		FALSE
147	Li P.	Nutritional value of fisheries by-catch and by-product meals in the diet of red drum (Sciaenops ocellatus)	2004	Aquaculture	10.1016/j.aquaculture.2004.02.010	FALSE	No data of sedimentary OC (or derived proxy)
148	Widdicombe S.	Importance of bioturbators for biodiversity maintenance: Indirect effects of fishing disturbance	2004	Marine Ecology Progress Series	10.3354/meps275001	FALSE	No data of sedimentary OC (or derived proxy)
149	Ansari Z.A.	Environmental influences on the trawl catches in a bay-estuarine system of Goa, west coast of India	2003	Estuarine, Coastal and Shelf Science	10.1016/S0272-7714(02)00201-9	FALSE	Not studying the impacts of bottom trawling
150	Cattaneo-Vietti R.	A marine biological underwater depuration system (MUDS) to process waste waters	2003	Biomolecular Engineering	10.1016/S1389-0344(03)00032-7	FALSE	Not studying the impacts of bottom trawling
151	Falcao M	Short-term environmental impact of clam dredging in coastal waters (south of Portugal): chemical disturbance and subsequent recovery of seabed	2003	Marine Environmental Research	10.1016/S0141-1136(03)00069-2	TRUE		TRUE
152	Stone R.	Characteristics of benthic sediments from areas open and closed to bottom trawling in the Gulf of Alaska	2003	U.S. Dep. Commer., NOAA Tech. Memo		TRUE		TRUE
153	Rosenberg R.	Benthic habitats in the northwest Mediterranean characterised by sedimentary organics, benthic macrofauna and sediment profile images	2003	Estuarine, Coastal and Shelf Science	10.1016/S0272-7714(02)00356-6	TRUE		FALSE	Uses trawling as an explanation of the results. It isn't either an observational or experimental study. Too many different variables that could confound the effect of bottom trawling
154	Warnken K.W.	The effects of shrimp trawling on sediment oxygen consumption and the fluxes of trace metals and nutrients from estuarine sediments	2003	Estuarine, Coastal and Shelf Science	https://doi.org/10.1016/S0272-7714(02)00316-5	TRUE		TRUE
155	Fiordelmondo C.	Short-Term Impact of Clam Harvesting on Sediment Chemistry, Benthic Microbes and Meiofauna in the Goro Lagoon (Italy)	2003	Chemistry and Ecology	https://doi.org/10.1080/0275754031000119924	TRUE		TRUE
156	Cabral H.N.	Importance of discards of a beam trawl fishery as input of organic matter into nursery areas within the Tagus estuary	2002	Hydrobiologia	10.1023/A:1020359913694	FALSE	No data of sedimentary OC (or derived proxy)
157	Göransson P.	Petersen's benthic macrofauna stations revisited in the Öresund area (southern Sweden) and species composition in the 1990s - Signs of decreased biological variation	2002	Sarsia	10.1080/00364820260400771	FALSE	No data of sedimentary OC (or derived proxy)
158	Ingole B.	Macrobenthic communities of the coastal waters of Dabhol, west coast of India	2002	Indian Journal of Marine Sciences		FALSE	Not studying the impacts of bottom trawling
159	Sibuet M.	Deep Sea Ecosystems on the Equatorial African Margin: First results of a Pluridisciplinary Environmental Programme and Discovery of Chemosynthetic Based Ecosystem	2002	International Conference on Health, Safety and Environment in Oil and Gas Exploration and Production	10.2118/73875-ms	FALSE	Not studying the impacts of bottom trawling
160	Bett B.J.	RRS discovery cruise 248, 07 Jul-10 Aug 2000. A multidisciplinary study of the environment and ecology of deep-water coral ecosystems and associated seabed facies and features (The Darwin Mounds, Porcupine Bank and Porcupine Seabight)	2001	Cruise Report of the Southampton Oceanography Centre		FALSE	Not applicable study
161	Bett B.J.	UK atlantic margin environmental survey: Introduction and overview of bathyal benthic ecology	2001	Continental Shelf Research	10.1016/S0278-4343(00)00119-9	FALSE	No comparative data of trawled/untrawled sites
162	Hidaka K.	Downward transport of organic carbon by diel migratory micronekton in the western equatorial pacific: Its quantitative and qualitative importance	2001	Deep-Sea Research Part I: Oceanographic Research Papers	10.1016/S0967-0637(01)00003-6	FALSE	Not studying the impacts of bottom trawling
163	Sparks-McConkey J.P.	Effects on the ecological integrity of a soft-bottom habitat from a trawling disturbance	2001	Hydrobiologia	doi: 10.1023/A:1013071629591	TRUE		TRUE
164	Watling L.	Impact of a scallop drag on the sediment chemistry , microbiota , and faunal assemblages of a shallow subtidal marine benthic community	2001	Journal of Sea Research	https://doi.org/10.1016/S1385-1101(01)00083-1	TRUE		TRUE
165	Dolmer P.	Short-term impact of blue mussel dredging (Mytilus edulis L.) on a benthic community	2001	Hydrobiologia	https://doi.org/10.1023/A:1014549026157	TRUE		TRUE	Before-After experiment with no data for the BEFORE. No difference between dredged and undredged, possibly because OC analyses were performed in -5 sections, whereas the expected penetration depth of dredgers is 2-3.
166	Diez I.	The North coast of Spain	2000	Seas at the millennium - an environmental evaluation - Volume 1		FALSE	?
167	Smith C.J.	Impact of otter trawling on an eastern Mediterranean commercial trawl fishing ground	2000	ICES Journal of Marine Science	10.1006/jmsc.2000.0927	TRUE		TRUE
168	Bett B.J.	RRS Charles Darwin Cruise 112C, 19 May-24 Jun 1998. Atlantic Margin Environmental Survey: Seabed survey of deep-water areas (17(th) round tranches) to the north and west of Scotland	1999	Cruise Report of the Southampton Oceanography Centre		FALSE	Not applicable study
169	Schwinghamer P.	Effects of experimental otter trawling on surficial sediment properties of a sandy-bottom ecosystem on the Grand Banks of Newfoundland	1998	Conservation Biology	10.1046/j.1523-1739.1998.0120061215.x	FALSE	No data of sedimentary OC (or derived proxy)
170	Tuck I.	Effects of physical trawling disturbance in a previously unfished sheltered Scottish sea loch	1998	JSTOR		TRUE		TRUE
171	Lindeboom H.J.	The effects of different types of fisheries on the north sea and Irish sea benthic ecosystems. IMACT -II	1998		https://edepot.wur.nl/340566	TRUE		FALSE	Results included in study 170
172	De Haas H.	Recent sedimentation and organic carbon burial in a shelf sea: The North Sea	1997	Marine Geology	10.1016/S0025-3227(97)00082-0	FALSE	Trawling as a possible explanation of their results
173	Sokolova M.N.	Trophic structure of abyssal macrobenthos	1997	Advances in Marine Biology		FALSE	Not studying the impacts of bottom trawling
174	Briggs K.B.	The classification and structure of megafaunal assemblages in the Venezuela Basin, Caribbean Sea	1996	Journal of Marine Research	10.1357/0022240963213736	FALSE	Not studying the impacts of bottom trawling
175	Piepenburg D.	Distribution, abundance, biomass, and mineralization potential of the epibenthic megafauna of the Northeast Greenland shelf	1996	Marine Biology	10.1007/BF00346313	FALSE	Not studying the impacts of bottom trawling
176	Piepenburg D.	Megabenthic communities in the waters around Svalbard	1996	Polar Biology	10.1007/s003000050074	FALSE	Not studying the impacts of bottom trawling
177	Sulak K.J.	Lilliputian bottom fish fauna of the Hatteras upper middle continental slope	1996	Journal of Fish Biology		FALSE	Not studying the impacts of bottom trawling
178	Witte U.	Metabolism of deep-sea sponges in the Greenland-Norwegian sea	1996	Journal of Experimental Marine Biology and Ecology	10.1016/0022-0981(96)00006-8	FALSE	Not studying the impacts of bottom trawling
179	Along D.M.	Decomposition and recycling of organic matter in muds of the Gulf of Papua, northern Coral Sea	1995	Continental Shelf Research	10.1016/0278-4343(94)00087-4	FALSE	Trawling as a possible explanation of their results
180	Alongi D.M.	Factors regulating benthic food chains in tropical river deltas and adjacent shelf areas	1995	Geo-Marine Letters	10.1007/BF01204456	FALSE	No data of sedimentary OC (or derived proxy)
181	Brylinsky M.	Impacts of Flounder Trawls on the Intertidal Habitat and Community of the Minas Basin, Bay of Fundy	1994	Canadian Journal of Fisheries and Aquatic Sciences	https://doi.org/10.1139/f94-066	TRUE		TRUE
182	Jayaraj E.G.	Benthic biomass and sediment distribution in the coastal waters off Mangalore and their possible influence on trawl fish catches of the zone	1992	Environment & Ecology		FALSE	?
183	Eleftheriou A.	The effects of experimental scallop dredging on the fauna and physical environment of a shallow sandy community	1992	Netherlands Journal of Sea Research	https://doi.org/10.1016/0077-7579(92)90067-O	TRUE		TRUE
184	Mayer L.M.	Effects of commercial dragging on sedimentary organic matter	1991	Marine Environmental Research	10.1016/0141-1136(91)90015-Z	TRUE		TRUE
185	Salchow R.	Quality Status Report of the North Sea Region 7a [Der Quality Status Report (QSR) für Region 7a]	1991	Deutsche Hydrographische Zeitschrift	10.1007/BF02231721	FALSE	?
186	van Bernem K.-H.	Sensitivity grid and thematic charting of the German Wadden Sea [Thematische Kartierung und Sensitivitätsraster im Deutschen Wattenmeer]	1991	Deutsche Hydrographische Zeitschrift	10.1007/BF02231714	FALSE	?
187	Along D.M.	Benthic processes across mixed terrigenous-carbonate sedimentary facies on the central Great Barrier Reef continental shelf	1989	Continental Shelf Research	10.1016/0278-4343(89)90034-4	FALSE	Trawling as a possible explanation of their results
188	Basford D.J.	The epifauna of the northern north sea (56°-61°N)	1989	Journal of the Marine Biological Association of the United Kingdom	10.1017/S0025315400029490	FALSE	Not studying the impacts of bottom trawling
189	Reise K.	Historical changes in the benthos of the Wadden Sea around the island of Sylt in the North Sea	1989	Helgoländer Meeresuntersuchungen	10.1007/BF02365901	FALSE	No data of sedimentary OC (or derived proxy)
190	Somers I.F.	Sediment type as a factor in the distribution of commercial prawn species in the western gulf of carpentaria, australia	1987	Marine and Freshwater Research	10.1071/MF9870133	FALSE	Not studying the impacts of bottom trawling
191	Theil H.	Biological oceanography of the red oceanic system	1984	Deep Sea Research Part A, Oceanographic Research Papers	10.1016/0198-0149(84)90043-8	FALSE	Not studying the impacts of bottom trawling
192	Sokolova M.N.	Trophic structure of deep-sea macrobenthos	1972	Marine Biology	10.1007/BF00347841	FALSE	Not studying the impacts of bottom trawling
193	Bandy O.L.	Distribution of foraminifera and sediments, Peru-Chile trench area	1964	Deep-Sea Research and Oceanographic Abstracts	10.1016/0011-7471(64)90951-9	FALSE	Not studying the impacts of bottom trawling

## Sheet: Table S2
Response variable	Variable description	Variable category	Experimental	Comparative control impact	Comparative gradient	Total
TOC	Concentration of total particulate organic carbon in the sample	Biogeochemical	14	19	21	54
Sand	Fraction of sand (63 µm - 2 mm) in the sample	Sedimentological	1	6	20	27
Mean grain size	Mean grain size fraction (d50) in the sample	Sedimentological	7	7	11	25
Chl-a	Concentration of chlorophyll-a in the sample	Biogeochemical	13	7	5	25
Mud content (< 63 µm)	Fraction of muddy sediments (< 63 µm) in the sample	Sedimentological	4	6	15	25
TN	Concentration of total nitrogen in the sample	Biogeochemical	9	11	3	23
TOC/TN	Ratio of organic carbon and total nitrogen content in the sample	Biogeochemical	10	9	3	22
Phaeopigments	Concentration of phaeopigment-related compounds in the sample	Biogeochemical	6	6	3	15
OM (LOI)	Concentration of organic matter measured from loss on ignition in the sample	Biogeochemical	6	1	8	15
Gravel	Fraction of gravel (> 2 mm) in the sample	Sedimentological	0	2	12	14
Phytopigments	Contentrations of total phytopigments compounds (sum of phaeopigments and chlorophyll-a) in the sample	Biogeochemical	5	7	1	13
Silt	Fraction of silt (4 - 63 µm) in the sample	Sedimentological	2	5	4	11
NOx	Concentration of dissolved nitrate and nitrite in the sample	Biogeochemical	2	1	6	9
TC	Total concentration of carbon (organic and inorganic) in the sample	Biogeochemical	1	4	4	9
Oxygen consumption	Measure of oxygen uptake (i.e. sediment community oxygen consumption, oxygen flux)	Biogeochemical	6	2	1	9
NHx	Concentration of dissolved ammonium and ammonia in the sample	Biogeochemical	2	2	4	8
NHx flux	Flux of ammonium and ammonia from the sample	Biogeochemical	8	0	0	8
Porosity	Porosity of the sample	Sedimentological	3	1	3	7
CaCO3	Concentration of calcium carbonate in the sample	Biogeochemical	0	3	4	7
NOx flux	Flux of nitrate and nitrite from the sample	Biogeochemical	6	0	1	7
Carbohydrates	Total carbohydrate concentrations in the sample	Biogeochemical	1	3	2	6
Phosphate	Concentration of dissolved phosphate in the sample	Biogeochemical	1	1	4	6
Proteins	Total protein concentrations in the sample	Biogeochemical	3	3	0	6
Clay	Fraction of clay (< 4 µm) in the sample	Sedimentological	1	5	0	6
Sorting	Measure of the distribution of grain sizes in the sample	Sedimentological	0	4	1	5
Water content	Water content in the sample	Sedimentological	2	1	2	5
Silicate	Concentration of dissolved silicate in the sample	Biogeochemical	1	0	4	5
Phosphate flux	Flux of dissolved phosphate from the sample	Biogeochemical	5	0	0	5
Algal fraction of BPC	Fraction of total phytopigment concentrations to the biopolymeric carbon content of the sample	Biogeochemical	1	4	0	5
Excess Pb-210	Concentration of excess Pb-210 (not supported by the decay of Ra-226) in the sample	Sedimentological	0	4	0	4
Skewness	The degree of symmetry or asymetry of the grain size distribution, complementary to grain size sorting	Sedimentological	0	0	4	4
Oxygen	Concentration of dissolved oxygen in the sample	Biogeochemical	0	0	4	4
TON	Concentration of total organic nitrogen	Biogeochemical	0	0	4	4
Dry bulk density	Density of sediment in a sample, taking into account the water content and compaction	Sedimentological	0	4	0	4
OM turnover	Turnover rate of organic matter obtained from enzymatic activity in the sample	Biogeochemical	1	3	0	4
Biopolymeric C (BPC)	Concentration of the biopolymeric fraction of organic carbon (sum of total lipids, proteins, and carbohydrates)	Biogeochemical	1	3	0	4
Lipids	Concentrations of total lipids in the sample	Biogeochemical	1	3	0	4
Kurtosis	Measure of the distribution of grain sizes in the sample, similar to sorting	Sedimentological	0	0	4	4
Silicate flux	Flux of dissolved silicate concentration from the sample	Biogeochemical	2	0	1	3
EHAA	Enzyme hydrolyzable amino acids	Biogeochemical	2	0	1	3
Excess Pb-210 penetration depth	Penetration depth where excess Pb-210 is no longer found in the sample, indicative that the sediment has been deposited over a century years ago	Sedimentological	0	3	0	3
Excess Pb-210 inventory	Total inventory of excess Pb-210 in the sediment core	Sedimentological	0	3	0	3
OPD	Oxygen penetration depth in the sample	Biogeochemical	2	0	1	3
DOU	Dissolved oxygen utilization	Biogeochemical	3	0	0	3
Protein turnover	Turnover rate of proteins in the sample measured using aminopeptidase	Biogeochemical	1	2	0	3
Very fine sand	Fraction of very fine sand (0.125 mm - 63 μm) in the sample	Sedimentological	2	0	1	3
β-glucosidase activity	Activity of β-glucosidase enzymes, used to calculate carbohydrate turnover rate in the sample	Biogeochemical	1	1	0	2
TP	Concentration of total phosphorus in the sample	Biogeochemical	2	0	0	2
TS	Concentration of total sulfur in the sample	Biogeochemical	2	0	0	2
Sediment Surface Area	Surface area of sediment grains in the sample, measured using a BET analyzer	Sedimentological	1	0	1	2
Bioirrigation	Absolute changes (over 6 h) in the concentration of an inert tracer as explained by Forster et al. (1999)	Biogeochemical	0	0	2	2
C oxidation	Total carbon oxidation from the sample as measured from the release of CO2	Biogeochemical	0	1	1	2
TIC	Concentration of total inorganic carbon in the sample	Biogeochemical	0	2	0	2
DIC	Concentration of dissolved inorganic carbon	Biogeochemical	1	1	0	2
P/C	Ratio of the concentration of total phosphorus and total carbon in the sample	Biogeochemical	1	1	0	2
THAA	Concentration of total hydrolyzable amino acids	Biogeochemical	0	1	1	2
Excess Th-234	Concentration of excess Th-234 (not supported by U-238) in the sample	Sedimentological	0	2	0	2
Excess Th-234 inventory	Total inventory of excess Th-234 in the sediment core	Sedimentological	0	2	0	2
Excess Th-234 penetration depth	Penetration depth where excess Th-234 is no longer found in the sample, indicative that the sediment has been deposited over 6 months ago	Sedimentological	0	2	0	2
Fine sand	Fraction of fine sand (0.250–0.125 mm) in the sample	Sedimentological	1	0	1	2
aminopeptidase activity	Activity of aminopeptidase enzymes, used to calculate protein turnover rate in the sample	Biogeochemical	1	1	0	2
Medium sand	Fraction of medium sand (0.500–0.250 mm) in the sample	Sedimentological	1	0	1	2
Hydrogen flux	Flux of hydrogen from the sample	Biogeochemical	2	0	0	2
bacterial C production	Bacterial C production was estimated from the incorporation of [3H]leucine, as described by Smith and Azam (1992), Kirchman (1993) and van Duyl and Kop (1994).	Biogeochemical	1	1	0	2
carbohydrate turnover	Turnover rate of carbohydrates in the sample, obtained from enzymatic activity	Biogeochemical	1	1	0	2
C-13	Isotopic signal of C-13 in the sample	Biogeochemical	0	1	1	2
Total Pb-210	Concentration of total Pb-210, the sum of excess Pb-210 and supported Pb-210 (equivalent to Ra-226)	Sedimentological	0	1	0	1
Bioavailable organic C	Sum of carbon equivalents of hydrolysable carbohydrates and proteins.	Biogeochemical	0	1	0	1
aRPD	Apparent redox potential discontinuity, which is the depth at which the sediment transitions from an oxidising to a reducing environment, as determined by the Fe3+/Fe2+ colour boundary	Biogeochemical	0	0	1	1
bacterial C efficiency	Estimation of carbon bioavailability, obtained from extracellular enzymatic activities of protein and carbohydrates to the total amount of C that actually turned into bacterial biomass.	Biogeochemical	0	1	0	1
TN/TS	Ratio of total nitrogen and total sulfur in the sample	Biogeochemical	1	0	0	1
Hydrolyzable carbohydrates	Concentration of carbohydrates that are hydrolyzed in the presence of β-glucosidase	Biogeochemical	0	1	0	1
TC/TS	Ratio of total carbon and total nitrogen in the sample	Biogeochemical	1	0	0	1
Sulphate reduction	Rate of sulphate reduction in the sample	Biogeochemical	0	0	1	1
IP	Concentration of inorganic phosphorus	Biogeochemical	1	0	0	1
L-PO4	Total microbial biomass and microbial community structure, determined using a single dichloro-methane/methanol extraction and by phospholipid analysis, the methods detailed in Findlay et al. (1989) and Findlay (1996)	Biogeochemical	1	0	0	1
Gross PP	Gross primary production of O2 in the sample	Biogeochemical	1	0	0	1
N-15	Isotopic composition of nitrogen in the sample	Biogeochemical	0	1	0	1
Net N flux	Net N flux from the sample from denitrification and nitrification processes	Biogeochemical	1	0	0	1
O2 uptake H2S reoxidation	Oxygen uptake from reoxidation of H2S	Biogeochemical	0	0	1	1
Bacteria uptake of C-13	Uptake of C-13 labelled algae by bacteria in an experimental setup	Biogeochemical	0	1	0	1
PRT:CHO	Ratio of protein to carbohydrate concentration, used as a measure of the lability of organic matter in the sample	Biogeochemical	1	0	0	1
EHAA/THAA	Ratio of enzymatically hidrolyzable amino acids and total hydrolyzable amino acids	Biogeochemical	0	0	1	1
Hydrolyzable protein	Concentration of proteins that are hydrolyzed in the presence of proteinase and protease	Biogeochemical	0	1	0	1
Sediment redox potential	Uptake of C-13 labelled algae in sediments in an experimental setup	Biogeochemical	0	1	0	1
Sediment uptake of C-13	Uptake of C-13 labelled algae in sediments in an experimental setup	Biogeochemical	0	1	0	1
Coxid sulphate reduction	Organic carbon reduced by sulphate	Biogeochemical	0	0	1	1
Coarse sand	Fraction of coarse sand (2.0 to 4.75 mm) in the sample	Sedimentological	0	0	1	1
Chl-a/(Chl-a+Phaeo-a)	Ratio of Chl-a to the total phytopigment concentration, used as a measure of the lability of organic matter in the sample	Biogeochemical	0	0	1	1
SML	Depth of sediment mixed layer, indicative of bioturbation, obtained using excess Th-234 or excess Pb-210 profiles	Sedimentological	0	1	0	1

## Sheet: Table S3
Parameter	Required (Y/N)	Description
Study_id	Y	Unique identifier of the individual study. Note that one manuscript can have several independent studies based on different study designs and/or study area and/or habitat type and/or fishing gear.
Reference	Y	Reference of the publication
Location	Y	Specific location of the study area (e.g. Gare Loch)
Region	Y	General region of the study area (e.g. North Sea, Mediterranean Sea)
Longhurst province	Y	Longhurst biogeographical province (Longhurst, 2010) of the study area
Latitude_study	Y	Approximate decimal latitude (WGS 84) of the study area.
Longitude_study	Y	Approximate decimal longitude (WGS 84) of the study area.
Study design	Y	Classification of the study design: experimental, comparative, gradient design
Sampling strategy	Y	Classification of the sampling strategy: Before-After (BA), Control-Impact (CI), Before-After-Control-Impact (BACI), Gradient-Design (GD)
Study_description	Y	A brief description of the study design and sampling strategy

## Sheet: Table S4
Parameter	Required (Y/N)	Description
Study_id	Y	Identifier of the study (foreign key linking to study_description).
Sample_id	Y	Unique identifier of the sampled site.
Sample name	Y	Name of the sample.
Sampling day	N	Day of the month when the sample was collected, if known.
Sampling month	N	Numerical value of the month when the sample was collected, if known
Sampling year	N	Year when the sample was collected, if known.
Latitude	N	Decimal latitude (WGS 84) of the sample, if known.
Longitude	N	Decimal longitude (WGS 84) of the sample, if known.
Water depth	N	Approximate water depth of the sediment sample, if known.
Habitat type	Y	Classification between muddy or sandy sediments.
Climate zone	Y	Classification between temperate and tropical climate zones.
Seasonality	Y	Seasonal classification.
Notes_site	N	Additional notes regarding the sampling area, if necessary.
Impact/Control	Y	Boolean classification (True/False) if a sample was collected in an impacted area or control site.
Before/After	N	Boolean classification (True/False) if a sample was collected before or after disturbance, if relevant.
Fishing gear type	Y	Classification of the trawling gear type (otter trawls, beam trawls, dredges, electric pulse trawl, artisanal, undefined)
Historically fished	Y	Boolean classification (True/False) if a site had been trawled in the past.
Fishing effort (SAR)	N	Harmonized fishing effort, if available.
Fishing effort error (SAR)	N	Error of the harmonized fishing effort, if available.
Time since fishing (days)	N	Time since the last fishing disturbance to account for recovery of the seafloor, if available.
Time since first disturbance (years)	Y	Approximate time in years since the area was first disturbed, to account for cumulative impacts.
Notes_fishing	N	Additional information related to fishing, if necessary.

## Sheet: Table S5
Parameter	Required (Y/N)	Description
Study_id	Y	Identifier of the study (foreign key linking to study_description).
Sample_id	Y	Identifier of the sampled site (foreign key linking to sampling_location).
Sampling_type	Y	Classification of sampling technique used (i.e. grab sample, core) or how the analysis was conducted (i.e. in-situ incubation, aquaria).
Depth slice	Y	Section depth where the sample was collected from (i.e. 0-1 cm).
Response variable	Y	Response variable measured.
Response value	Y	Value obtained from the response variable measured.
Error estimate	N	Error estimate of the response variable, if available.
Response unit	Y	Unit of the response variable measured.
Error estimate type	N	Measure used to report the error (i.e. standard deviation, standard error), if applicable
Replicates	Y	Number of replicates.
Figure/Table	Y	Figure or table where the data was extracted from, or whether it was provided by the author through personal communication.
Notes	N	Additional information regarding the data extracted
