# Supplementary material for: Demersal fishery Impacts on Sedimentary Organic Matter (DISOM): a global harmonized database of studies assessing the impacts of demersal fisheries on sediment biogeochemistry
Source: Copernicus journal article supplement (doi:10.5194/essd-16-3547-2024), 2024-08-07
Supplement: Supplementary file 1 [file essd-16-3547-2024-supplement.zip]

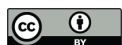

## *Supplement of*

# **Demersal fishery Impacts on Sedimentary Organic Matter (DISOM): a global harmonized database of studies assessing the impacts of demersal fisheries on sediment biogeochemistry**

**Sarah Paradis et al.**

*Correspondence to:* Sarah Paradis ([sparadis@ethz.ch](mailto:sparadis@ethz.ch))

- [essd-16-3547-2024-supplement-title-page.pdf](#)
- [Supplementary\\_tables.xlsx](#)

The copyright of individual parts of the supplement might differ from the article licence.
